# Supplementary material for: The effect of fluorine substitution on chiral recognition: interplay of CH⋯π, OH⋯π and CH⋯F interactions in gas-phase complexes of 1-aryl-1-ethanol with butan-2-ol
Source: Royal Society of Chemistry journal article supplement (doi:10.1039/c3cp53215a), 2013-01-01
Supplement: c3cp53215a.pdf [file c3cp53215a.pdf]

## SUPPLEMENTARY INFORMATION

D-B3LYP/6-31++G\*\* structures, relative energies (kcal/mol)  $\nu_{\text{O}^{\text{bu}}\text{H}}$  and  $\nu_{\text{O}^{\text{H}}}$  frequencies of the So ground state of the complexes of  $\text{oFE}_S$ ,  $\text{pFE}_S$  and  $\text{E}_R$  with butan-2-ol.

### Non-fluorinated complexes: homochiral

$\text{E}_S\text{-Bu}_S$  (all frequencies are scaled by 0.96)

|   | $E_{\text{rel}}$ (Kcal/mol) | Low Frequency ( $\text{cm}^{-1}$ ) | High Frequencies ( $\text{cm}_1$ ) |                                                                                       |
|---|-----------------------------|------------------------------------|------------------------------------|---------------------------------------------------------------------------------------|
| A | 0.00                        | 28.2                               | 3463.6<br>3624.1                   | 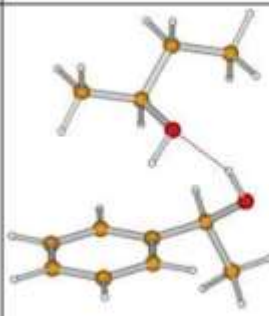   |
| B | 0.06                        | 23.4                               | 3455.2<br>3633.9                   |   |
| C | 0.06                        | 25.2                               | 3423.6<br>3651.8                   |  |
| D | 0.54                        | 18.1                               | 3442.0<br>3647.9                   |  |
| E | 0.67                        | 18.0                               | 3423.9<br>3647.9                   |  |

|   |      |      |                  |                                                                                      |
|---|------|------|------------------|--------------------------------------------------------------------------------------|
| F | 0.87 | 16.2 | 3456.2<br>3653.4 | 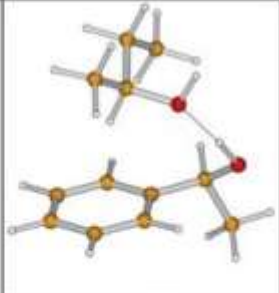  |
| G | 0.91 | 17.1 | 3461.9<br>3612.6 |   |
| H | 1.58 | 14.5 | 3433.1<br>3673.8 |  |

## Non-fluorinated complexes: heterochiral

Es-BUR (All frequencies are scaled by 0.96)

|   | $E_{rel}$ (Kcal/mol) | Low Frequency ( $cm^{-1}$ ) | High Frequencies ( $cm^{-1}$ ) |                                                                                       |
|---|----------------------|-----------------------------|--------------------------------|---------------------------------------------------------------------------------------|
| A | 0.00                 | 29.0                        | 3442.7<br>3634.4               | 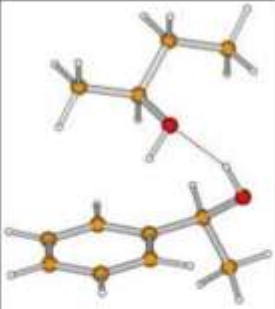   |
| B | 0.28                 | 28.5                        | 3473.2<br>3627.2               |    |
| D | 0.68                 | 21.7                        | 3482.6<br>3601.9               |   |
| C | 0.68                 | 15.3                        | 3441.7<br>3673.0               |  |
| E | 0.68                 | 11.2                        | 3449.8<br>3637.9               |  |

|   |      |      |                  |                                                                                      |
|---|------|------|------------------|--------------------------------------------------------------------------------------|
| F | 1.05 | 29.2 | 3444.8<br>3683.5 | 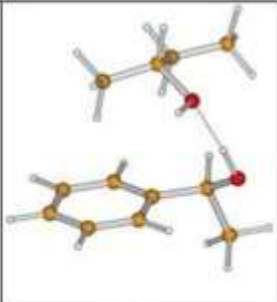  |
| G | 1.08 | 25.6 | 3446.6<br>3650.9 |   |
| H | 1.26 | 21.7 | 3441.3<br>3678.3 |  |

## Ortho-fluorinated complexes: homochiral

$o\text{FE}_s\text{-B}_s$

|          | $ZPE_{\text{rel}}$ (Kcal/mol)                                                                                               | Low Frequencies (cm <sup>-1</sup> ) | High Frequencies (cm <sup>-1</sup> ) |
|----------|-----------------------------------------------------------------------------------------------------------------------------|-------------------------------------|--------------------------------------|
| <b>A</b> |  <p style="text-align: center;">0.00</p>   | 40<br>53<br>62<br>67<br>83<br>96    | 3433<br>3661                         |
| <b>B</b> |  <p style="text-align: center;">0.37</p>   | 25<br>36<br>50<br>61<br>77<br>84    | 3471<br>3635                         |
| <b>C</b> |  <p style="text-align: center;">0.57</p>  | 28<br>41<br>49<br>55<br>77<br>90    | 3421<br>3652                         |
| <b>D</b> |  <p style="text-align: center;">1.04</p> | 17<br>46<br>55<br>78<br>87          | 3462<br>3655                         |
| <b>E</b> |  <p style="text-align: center;">1.14</p> | 12<br>31<br>51<br>56<br>77<br>86    | 3491<br>3659                         |

|   |                                                                                             |                                  |              |
|---|---------------------------------------------------------------------------------------------|----------------------------------|--------------|
| F | <br>1.19   | 7<br>37<br>46<br>52<br>69<br>81  | 3500<br>3684 |
| G | <br>1.42   | 18<br>34<br>48<br>60<br>69<br>87 | 3472<br>3650 |
| H | <br>1.45  | 23<br>41<br>57<br>60<br>77       | 3426<br>3675 |
| I | <br>1.51 | 22<br>49<br>60<br>66<br>82<br>92 | 3468<br>3617 |

\* All frequencies are scaled by 0.96

## Ortho-fluorinated complexes: heterochiral

oFE<sub>S</sub>-Bu<sub>R</sub>

|   | $\Delta E_{rel}$ (Kcal/mol) - | Low Frequency (cm <sup>-1</sup> ) | High Frequency (cm <sup>-1</sup> ) |  |
|---|-------------------------------|-----------------------------------|------------------------------------|--|
| A | 0.00                          | 19.9                              | 3452<br>3643                       |  |
| B | 0.75                          | 30.1                              | 3454<br>3684                       |  |
| C | 0.77                          | 30.5                              | 3459<br>3653                       |  |
| D | 0.95                          | 29.2                              | 3446<br>3675                       |  |
| E | 1.11                          | 32.6                              | 3500<br>3600                       |  |
| F | 1.14                          | 26.8                              | 3479<br>3661                       |  |
| G | 1.21                          | 11.2 / 29.0                       | 3465<br>3681                       |  |
| H | 1.28                          | 13.8 / 34.4                       | 3484<br>3640                       |  |
| I | 1.42                          | 19.3                              | 3428<br>3654                       |  |

\* All frequencies are scaled by 0.96

## Para-fluorinated complexes: homochiral

pFE<sub>5</sub>-Bu<sub>5</sub>

|   | $E_{\text{REL}}$ (kcal/mol) |                                                                                      |
|---|-----------------------------|--------------------------------------------------------------------------------------|
| A | + 0.00                      |    |
| B | +0.32                       |    |
| C | +0.47                       |   |
| D | +0.98                       |  |



|   |       |                                                                                    |
|---|-------|------------------------------------------------------------------------------------|
| E | +0.99 |  |
| F | +1.34 |  |

**Para-fluorinated complexes: heterochiral**

pFE<sub>S</sub>Bu<sub>R</sub>

|   | E <sub>REL</sub> (kcal/mol) |                                                                                      |
|---|-----------------------------|--------------------------------------------------------------------------------------|
| A | + 0.00                      | 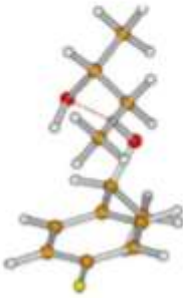 |
| B | +0.06                       |  |

|   |       |                                                                                      |
|---|-------|--------------------------------------------------------------------------------------|
| C | +0.24 | 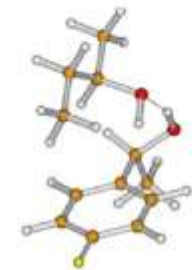   |
| D | +0.63 |    |
| E | +0.70 |   |
| F | +1.04 |  |

Table S1: energy components analysis: contribution of hydrogen bond, CH... $\pi$ , OH... $\pi$ , CH...F interactions to the total energy as calculated by MM3 force field at the D-B3LYP/6-31++G\*\* minimum energy geometries.

| Conformer            | OH...O | CH... $\pi$ | OH... $\pi$ | CH...F |
|----------------------|--------|-------------|-------------|--------|
| $oA_{\text{hetero}}$ | 3.18   | 0.57        | 0.79        | 0.25   |
| $oB_{\text{hetero}}$ | 3.12   | 0.60        | 0.02        | 0.11   |
| $oA_{\text{homo}}$   | 2.95   | 0.11        | 0.57        | 0.19   |
| $oB_{\text{homo}}$   | 3.32   | 0.16        | 0.90        | 0.14   |
| $pA_{\text{hetero}}$ | 3.10   | 0.22        | 0.77        | 0.16   |
| $pB_{\text{hetero}}$ | 3.40   | 0.54        | 1.05        | 0.15   |
| $pC_{\text{hetero}}$ | 3.07   | 0.59        | 0.80        | 0.12   |
| $pA_{\text{homo}}$   | 3.27   | 0.78        | 0.99        | 0.2    |
| $pB_{\text{homo}}$   | 3.43   | 0.82        | 1.06        | 0.12   |
| $A_{\text{hetero}}$  | 3.06   | 0.62        | 0.82        |        |
| $B_{\text{hetero}}$  | 3.42   | 0.57        | 1.07        |        |
| $C_{\text{hetero}}$  | 3.26   | 0.32        | 0.30        |        |
| $D_{\text{hetero}}$  | 3.39   | 0.79        | 1.07        |        |
| $A_{\text{homo}}$    | 3.26   | 0.29        | 0.98        |        |
| $B_{\text{homo}}$    | 3.25   | 0.88        | 0.95        |        |
| $D_{\text{homo}}$    | 3.16   | 0.63        | 0.13        |        |
